# Supplementary material for: Spatial and Temporal Trends of SARS-CoV-2 RNA from Wastewater Treatment Plants over 6 Weeks in Cape Town, South Africa
Source: MDPI journal article supplement (doi:10.3390/ijerph182212085), 2021-11-17
Supplement: s1 [file s1]

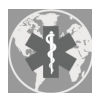

**Table S1.** Wastewater treatment plant characteristics (1).

| Wastewater Treatment Plant | Capacity (Ml/day) | Plant type        |
|----------------------------|-------------------|-------------------|
| Athlone                    | 105               | Activated sludge  |
| Bellville                  | 54.6              | Activated sludge  |
| Borcherds Quarry           | 35                | Activated sludge  |
| Camps Bay                  | 5.5               | Sea outfall       |
| Cape Flats                 | 200               | Activated sludge  |
| Fisantekraal               | 24                | Activated sludge  |
| Gordons Bay                | 3.1               | Activated sludge  |
| Green Point                | 40                | Sea outfall       |
| Hout Bay                   | 9.8               | Sea outfall       |
| Klipheuwel                 | 0.07              | Rotating bio disc |
| Kraaifontein               | 17.5              | Activated sludge  |
| Llandudno                  | 0.28              | Rotating bio disc |
| Macassar                   | 38                | Activated sludge  |
| Melkbosstrand              | 5.4               | Activated sludge  |
| Millers Point              | 0.06              | Rotating bio disc |
| Mitchells Plain            | 45                | Activated sludge  |
| Oudekraal                  | 0.03              | Rotating bio disc |
| Potsdam                    | 47                | Activated sludge  |
| Scottsdene                 | 12.5              | Activated sludge  |
| Simons Town                | 2.5               | Bio filters       |
| Wesfleur Domestic          | 8                 | Activated sludge  |
| Wesfleur Industrial        | 6                 | Activated sludge  |
| Wildevolevlei              | 14                | Activated sludge  |
| Zandvliet                  | 72                | Activated sludge  |

1. Water and Sanitation department of the City of Cape Town. Water Services and the Cape Town Urban Water cycle. 2018.
